# Supplementary material for: LILY-lipidome isotope labeling of yeast: in vivo synthesis of13C labeled reference lipids for quantification by mass spectrometry
Source: Royal Society of Chemistry journal article supplement (doi:10.1039/c7an00107j), 2017-01-01
Supplement: c7an00107j2.xlsx [file c7an00107j2.xlsx]

## Sheet: FragmentList
Negative Mode
	12C	13C	Product Ion	12C	13C	Product Ion/ Neutral Loss
PA	152.995	156.005	C3H6PO5- Glycerol-phosphate
PC				60.0211	62.0278	C2H4O2 (Formate+CH3)
PE
PG
PI				241.011	247.031	C6H10PO8 (IP-H2O headgroup)
PS				87.032	90.0421	C3H5NO2 ( Serine)
CL
IPC	259.022	265.043	IP headgroup	241.011	247.031	C6H10PO8 (IP-H2O headgroup)
MIPC				421.075	433.116	C12H22O14P (MIP)
Positive Mode
	12C	13C	Product Ion/ Neutral Loss
PA	115.003	115.003	H6NO4P (Phosphate+ammonia)
PC	184.073	189.09	C5H15NO4P (PC headgroup)
PE	141.019	143.026	C2H8O4NP (PE headgroup)
PG	189.04	192.05	C3H12NO6P (PG headgroup+ammonia)
PI	277.056	283.076	C6H16NO9P (PI headgroup+ammonia)
PS	185.008	188.018	C3H8NO6P (PS headgroup+ammonia)
DMPE	169.05	173.064	C4H12NO4P (phosphodimethylethanolamine)
Cer			Long chain base
HexCer			Hexosyl /Long chain base
Quantified lipids are marked in orange.
Bold font type indicates a product ion while normal font indicates a neutral loss.

## Sheet: PA_neg
Labeling degree: 99.75-99.85% According to Isotope pattern calculated by IsoPro 3.1
Phosphatidic acid
					Observed mass
PA species	FASSL		RT (min)		12C	100% 13C	[M]
PA [32:1]	PA [16:0-16:1]	PA[14:0-18:1]	10.68		645.45	680.567	H67 C35 O8 P1
PA [32:2]	PA [16:1-16:1]	PA[14:0-18:2]	9.59		643.434	678.551	H65 C35 O8 P1
PA [33:1]	PA [16:0-17:1]		11.37		659.465	695.586	H69 C36 O8 P1
PA [33:2]	PA [16:1-17:1]		10.34		657.45	693.57	H67 C36 O8 P1
PA [33:3]	PA [15:0-18:3]		9.36		655.434	691.555	H65 C36 O8 P1
PA [34:1]	PA [16:0-18:1]		11.95		673.481	710.605	H71 C37 O8 P1
PA [34:2]	PA [16:1-18:1]	PA [16:0-18:2]	10.97		671.465	708.589	H69 C37 O8 P1
PA [34:3]	PA [16:1-18:2]	PA [16:0-18:3]	9.81	10.07	669.45	706.574	H67 C37 O8 P1
PA [34:4]	PA [16:2-18:2]	PA [16:1-18:3]	8.81		667.434	704.558	H65 C37 O8 P1
PA [35:1]	PA [17:0-18:1]		12.51		687.496	725.624	H73 C38 O8 P1
PA [35:2]	PA [17:1-18:1]		11.59		685.481	723.608	H71 C38 O8 P1
PA [35:3]	PA [17:1-18:2]		10.56		683.465	721.593	H69 C38 O8 P1
PA [35:4]	PA [17:2-18:2]		9.52		681.45	719.577	H67 C38 O8 P1
PA [36:1]	PA [18:0-18:1]		13.06		701.512	740.643	H75 C39 O8 P1
PA [36:2]	PA [18:0-18:2]		12.05		699.496	738.627	H73 C39 O8 P1
PA [36:3]	PA [18:1-18:2]		11.13		697.481	736.612	H71 C39 O8 P1
PA [36:4]	PA [18:2-18:2]		10.13		695.465	734.596	H69 C39 O8 P1
PA [36:5]	PA [18:3-18:2]		9.15		693.45	732.58	H67 C39 O8 P1
PA [36:6]	PA [18:3-18:3]		8.11		691.434	730.565	H65 C39 O8 P1

## Sheet: PC_neg
Labeling degree: 99.7-99.8% According to Isotope pattern calculated by IsoPro 3.1
Phosphatidylcholine					additionally crosschecked with positive mode
					Observed mass
PC species	FASSL		RT (min)		12C	100% 13C	[M]
PC [32:1]	PC [16:0-16:1]		11.05		776.544	816.678	H78 C40 N1 O8 P1
PC [32:2]	PC [16:1-16:1]	PC [14:0-18:2]	9.87		774.529	814.663	H76 C40 N1 O8 P1
PC [32:3]	PC [16:1-16:2]		8.83		772.513	812.647	H74 C40 N1 O8 P1
PC [33:1]	PC [15:0-18:1]	PC [16:0-17:1]	11.68		790.56	831.697	H80 C41 N1 O8 P1
PC [33:2]	PC [16:1-17:1]		10.67		788.544	829.682	H78 C41 N1 O8 P1
PC [33:3]	PC [16:1-17:2]	PC [15:0-18:3]	9.44	9.74	786.529	827.666	H76 C41 N1O8P1
PC [34:1]	PC [16:0-18:1]		12.28		804.575	846.716	H82 C42 N1 O8 P1
PC [34:2]	PC [16:1-18:1]	PC [16:0-18:2]	11.33		802.56	844.701	H80 C42 N1 O8 P1
PC [34:3]	PC [16:1-18:2]	PC [16:0-18:3]	10.16	10.4	800.544	842.685	H78 C42 N1 O8 P1
PC [34:4]	PC [16:1-18:3]	PC [16:2-18:2]	9.09		798.529	840.669	H76 C42 N1 O8 P1
PC [34:5]	PC [16:2-18:3]	PC [16:3-18:2]	7.96		796.513	838.654	H74 C42 N1 O8 P1
PC [34:6]	PC [16:3-18:3]		6.83		794.497	836.638	H72 C42 N1 O8 P1
PC [35:1]	PC [17:0-18:1]		12.86		818.591	861.735	H84 C43 N1 O8 P1
PC [35:2]	PC [17:1-18:1]		11.82		816.575	859.72	H82 C43 N1 O8 P1
PC [35:3]	PC [17:1-18:2]		10.76		814.56	857.704	H80 C43 N1 O8 P1
PC [35:4]	PC [17:1-18:3]		9.87		812.544	855.688	H78 C43 N1 O8 P1
PC [36:1]	PC [18:0-18:1]		13.38		832.607	876.754	H86 C44 N1 O8 P1
PC [36:2]	PC [18:1-18:1]	PC [18:0-18:2]	12.4		830.591	874.739	H84 C44 N1 O8 P1
PC [36:3]	PC [18:0-18:3]	PC [18:1-18:2]	11.45		828.575	872.723	H82 C44 N1 O8 P1
PC [36:4]	PC [18:1-18:3]	PC [18:2-18:2]	10.47		826.56	870.707	H80 C44 N1 O8 P1
PC [36:5]	PC [18:2-18:3]		9.5		824.544	868.692	H78 C44 N1 O8 P1
PC [36:7]	PC [18:3-18:3]		8.4		822.529	866.676	H76 C44 N1 O8 P1
PC [37:2]	PC [18:0-19:2]		12.92		844.607	889.758	H86 C45 N1 O8 P1
PC [37:3]	PC [18:1-19:2]		12.08		842.591	887.742	H84 C45 N1 O8 P1
PC [38:2]	PC [18:1-20:1]		13.38		858.622	904.777	H88 C46 N1 O8 P1
PC [38:3]	PC [18:2-20:1]		12.57		856.607	902.761	H86 C46 N1 O8 P1
PC [38:4]	PC [18:2-20:2]	PC [18:2-20:2]	11.68		854.591	900.745	H84 C46 N1 O8 P1
PC [38:5]	PC [18:2-20:3]	PC [18:3-20:2]	10.82		852.575	898.73	H82 C46 N1 O8 P1

## Sheet: PE_neg
Labeling degree: 99.8% According to Isotope pattern calculated by IsoPro 3.1
Phosphatidylethanolamine
					Observed mass
PE species	FASSL		RT (min)		12C	100% 13C	[M]
PE [32:1]	PE [16:0-16:1]	PE [14:0-18:1]	11.32		688.492	725.616	H72 C37 N1 O8 P1
PE [32:2]	PE [16:1-16:1]	PE [14:0-18:2]	10.37		686.476	723.6	H70 C37 N1 O8 P1
PE [32:3]	PE [14:0-18:3]		9.23		684.46	721.585	H68 C37 N1 O8 P1
PE [33:1]	PE [15:0-18:1]	PE [16:0-17:1]	11.98		702.507	740.635	H74 C38 N1 O8 P1
PE [33:2]	PE [16:1-17:1]		11.02		700.492	738.619	H72 C38 N1 O8 P1
PE [34:1]	PE [16:0-18:1]		12.53		716.523	755.654	H76 C39 N1 O8 P1
PE [34:2]	PE [16:1-18:1]	PE [16:0-18:2]	11.65		714.507	753.638	H74 C39 N1 O8 P1
PE [34:3]	PE [16:1-18:2]	PE [16:0-18:3]	10.5	10.73	712.492	751.623	H72 C39 N1 O8 P1
PE [34:4]	PE [16:1-18:3]	PE[16:2-18:2]	9.47		710.476	749.607	H70 C39 N1 O8 P1
PE [34:5]	PE [16:2-18:3]		8.31		708.46	747.591	H68 C39 N1 O8 P1
PE [35:1]	PE [17:0-18:1]		13.09		730.539	770.673	H78 C40 N1 O8 P1
PE [35:2]	PE [17:0-18:2]		12.28		728.523	768.657	H76 C40 N1 O8 P1
PE [35:3]	PE [17:0-18:3]		11.16		726.507	766.642	H74 C40 N1 O8 P1
PE [35:4]	PE [17:1-18:3]		10.16		724.492	764.626	H72 C40 N1 O8 P1
PE [35:5]	PE [17:2-18:3]		9.02		722.476	762.61	H70 C40 N1 O8 P1
PE [36:1]	PE [18:0-18:1]		13.58		744.554	785.692	H80 C41 N1 O8 P1
PE [36:2]	PE [18:0-18:2]	PE[18:1-18:1]	12.66		742.539	783.676	H78 C41 N1 O8 P1
PE [36:3]	PE [18:0-18:3]	PE[18:1-18:2]	11.76		740.523	781.661	H76 C41 N1 O8 P1
PE [36:4]	PE [18:2-18:2]	PE[18:1-18:3]	10.79		738.507	779.645	H74 C41 N1 O8 P1
PE [36:5]	PE [18:2-18:3]		9.84		736.492	777.629	H72 C41 N1 O8 P1
PE [36:6]	PE [18:3-18:3]		8.75		734.476	775.614	H70 C41 N1 O8 P1

## Sheet: PG_neg
Labeling degree: 99.5-99.7% According to Isotope pattern calculated by IsoPro 3.1
Phosphatidylglycerols
					Observed mass
PG species	FASSL		RT (min)		12C	100% 13C	[M]
PG [32:1]	PG [16:0-16:1]	PG [14:0-18:1]	11.96		719.486	757.614	H73 C38 O10 P1
PG [34:1]	PG [16:0-18:1]		11.33		747.518	787.652	H77 C40 O10 P1
PG [34:2]	PG [16:0-18:2]	PG [16:1-18:1]	10.33		745.502	785.636	H75 C40 O10 P1
PG [34:3]	PG [16:0-18:3]	PG [16:1-18:2]	9.12	9.44	743.486	783.621	H73 C40 O10 P1
PG [34:4]	PG [16:1-18:3]		8.09		741.471	781.605	H71 C40 O10 P1
PG [36:1]	PG [18:0-18:1]		12.4		775.549	817.69	H81 C42 O10 P1
PG [36:2]	PG [18:1-18:1]		11.43		773.533	815.674	H79 C42 O10 P1
PG [36:3]	PG [18:1-18:2]		10.49		771.518	813.659	H77 C42 O10 P1
PG [36:4]	PG [18:1-18:3]	PG [18:2-18:2]	9.52		769.502	811.643	H75 C42 O10 P1
PG [36:5]	PG [18:2-18:3]		8.49		767.486	809.627	H73 C42 O10 P1
PG [36:6]	PG [18:3-18:3]		7.44		765.471	807.612	H71 C42 O10 P1

## Sheet: PI_neg
Labeling degree: 99.7 % According to Isotope pattern calculated by IsoPro 3.1
Phosphatidylinositol
					Observed mass
PI species	FASSL		RT (min)		12C	100% 13C	[M]
PI [32:1]	PI [16:0 - 16:1]		9.44	10.84	807.503	848.641	H77 C41 O13 P1
PI [32:2]	PI [16:1 - 16:1]		8.37		805.488	846.625	H75 C41 O13 P1
PI [33:1]	PI [16:0 - 17:1]		10.16		821.519	863.661	H79 C42 O13 P1
PI [33:2]	PI [18:2 - 15:0]		9.09		819.504	861.646	H77 C42 O13 P1
PI [34:1]	PI [16:0 - 18:1]		10.82		835.535	878.681	H81 C43 O13 P1
PI [34:2]	PI [16:0 - 18:2]		9.84		833.519	876.664	H79 C43 O13 P1
PI [34:3]	PI [16:1 - 18:2]	PI [16:0 - 18:3]	8.51	8.83	831.505	874.649	H77 C43 O13 P1
PI [35:1]	PI [17:0 - 18:1]		11.48		849.55	893.699	H83 C44 O13 P1
PI [35:2]	PI [17:0 - 18:2]		10.47		847.535	891.682	H81 C44 O13 P1
PI [36:1]	PI [18:1 - 18:0]		11.98		863.565	908.718	H85 C45 O13 P1
PI [36:2]	PI [18:1 - 18:1]	PI [18:0 - 18:2]	10.99	11.14	861.552	906.701	H83 C45 O13 P1
PI [36:3]	PI [18:1 - 18:2]		9.98		859.535	904.687	H81 C45 O13 P1
PI [36:4]	PI [18:2 - 18:2]	PI [18:1 - 18:3]	8.89		857.52	902.671	H79 C45 O13 P1
PI [36:5]	PI [18:2 - 18:3]		7.85		855.503	900.655	H77 C45 O13 P1
PI [36:6]	PI [18:3 - 18:3]	PI [18:4 - 18:2]	6.67		853.489	898.639	H75 C45 O13 P1

## Sheet: PS_neg
Labeling degree: 99.8 % According to Isotope pattern calculated by IsoPro 3.1
Phosphatidylserine
				Observed mass
PS species	FASSL		RT (min)	12C	100% 13C	[M]
PS [32:1]	PS [16:1 - 16:0]	PS [18:1 - 14:0]	9.81	732.482	770.61	H72 C38 N1 O10 P1
PS [32:2]	PS [18:2 - 14:0]	PS [16:1 - 16:1]	8.63	730.466	768.596	H70 C38 N1 O10 P1
PS [34:1]	PS [18:1 - 16:0]		11.1	760.514	800.649	H76 C40 N1 O10 P1
PS [34:2]	PS [18:2 - 16:0]		10.1	758.497	798.633	H74 C40 N1 O10 P1
PS [34:3]	PS [18:3 - 16:0]	PS [18:2 - 16:1]	9.18	756.483	796.617	H72 C40 N1 O10 P1
PS [36:1]	PS [18:1 - 18:0]		12.4	788.547	830.687	H80 C42 N1 O10 P1
PS [36:2]	PS [18:1 - 18:1]	PS [18:2 - 18:0]	11.3	786.53	828.67	H78 C42 N1 O10 P1
PS [36:3]	PS [18:2 - 18:1]	PS [18:3 - 18:0]	10.3	784.515	826.656	H76 C42 N1 O10 P1
PS [36:4]	PS [18:3 - 18:1]	PS [18:2 - 18:2]	9.2	782.498	824.639	H74 C42 N1 O10 P1
PS [36:5]	PS [18:2 - 18:3]		8.14	780.483	822.624	H72 C42 N1 O10 P1

## Sheet: DMPE_pos
Labeling degree: 99.7 % According to Istope pattern calculated by IsoPro 3.1
DMPE
		Observed mass
DMPE species	RT (min)	12C	100% 13C	[M]
DMPE [36:4]	9.7	740.522	781.66	H74 C41 N1 O8 P1
DMPE [36:3]	10.72	742.539	783.677	H76 C41 N1 O8 P1
DMPE [36:2]	11.68	744.554	785.692	H78 C41 N1 O8 P1
DMPE [36:1]	11.73	746.57	787.708	H80 C41 N1 O8 P1
DMPE [38:6]	8.81	764.521	805.659	H74 C43 N1 O8 P1
DMPE [38:5]	10.31	766.537	807.675	H76 C43 N1 O8 P1
DMPE [38:4]	9.88	768.554	809.692	H78 C43 N1 O8 P1

## Sheet: LysoGPL_neg
Labeling degree: 99.8 % According to Isotope pattern calculated by IsoPro 3.1
Lysophospholipids			additionally crosschecked with positive mode
			Observed mass
Class/ Species		RT (min)	12C	100% 13C	Adduct	[M]
LysoPA	LPA [16:0]	1.51	409.236	428.299	M-H	H39 C19 O7 P1
	LPA [18:1]	1.55	435.251	456.322	M-H	H42 C21 O7 P1
	LPA [18:2]	1.23	433.236	454.306	M-H	H40 C21 O7 P1
	LPE [16:0]	1.54	452.278	473.348	M-H	H44 C21 N1 O7 P1
	LPE [16:1]	1.17	450.262	471.333	M-H	H42 C21 N1 O7 P1
	LPE [17:1]	1.38	464.278	486.352	M-H	H44 C22 N1 O7 P1
	LPE [18:0]	2.63	480.309	503.386	M-H	H48 C23 N1 O7 P1
	LPE [18:1]	1.62	478.293	501.371	M-H	H46 C23 N1 O7 P1
LysoPC	LPC [16:0]	1.61	540.33	564.411	M-H+HCO2H	H52 C25 N1 O7 P1
	LPC [16:1]	1.21	538.314	562.395	M-H+HCO2H	H50 C25 N1 O7 P1
	LPC [16:2]	0.96	536.299	560.379	M-H+HCO2H	H48 C25 N1 O7 P1
LysoPGL	LPG [16:0]	1.39	483.272	505.346	M-H	H45 C22 O9 P1
	LPG [18:1]	1.4	509.288	533.368	M-H	H47 C24 O9 P1
	LPG [18:2]	1.12	507.272	531.353	M-H	H45 C24 O9 P1
	LPG [18:3]	1	505.257	529.337	M-H	H43 C24 O9 P2

## Sheet: CL_neg
Labeling degree: 99.8 % According to Isotope pattern calculated by IsoPro 3.1
Cardiolipins
									Observed mass
CL species	FASSL						RT (min)		12C	100% 13C	[M]
CL [70:6]	18,1	18,3	16,1	16,0			16.62	16.85	1423.96	1503.23	H142 C79 O17 P2
CL [71:9]	17,3	17,1	18,3	18,1			16.27		1431.93	1512.2	H138 C80 O17 P2
CL [71:8]	17,3	17,2	17,1	18,3	18,2	18,1	16.24	16.56	1433.95	1514.22	H140 C80 O17 P2
CL [72:11]	18,3	18,2					15.72	16.14	1441.92	1523.19	H136 C81 O17 P2
CL [72:10]	18,3	18,2	18,1	18,4			16.13		1443.93	1525.21	H138 C81 O17 P2
CL [72:9]	18,3	18,2	18,1				16.42		1445.95	1527.22	H140 C81 O17 P2
CL [72:8]	18,3	18,2	18,1				16.44	16.68	1447.96	1529.24	H142 C81 O17 P2
CL [72:7]	18,3	18,2	18,1	18,0			16.65	16.85	1449.98	1531.25	H144 C81 O17 P2
CL [72:6]	18,3	18,2	18,1	18,0			16.88	17.07	1452	1533.27	H146 C81 O17 P2
CL [72:5]	18,2	18,1	18,0				17.05		1454.01	1535.28	H148 C81 O17 P2

[truncated: 7 more sheets: Cer_pos, HexCer_pos, IPC_neg, MIPC_neg, DAG_pos, TAG_pos, Summary]
