# Supplementary material for: LILY-lipidome isotope labeling of yeast: in vivo synthesis of13C labeled reference lipids for quantification by mass spectrometry
Source: Royal Society of Chemistry journal article supplement (doi:10.1039/c7an00107j), 2017-01-01
Supplement: c7an00107j3.pdf [file c7an00107j3.pdf]

Supporting information

Extended methods section

**S1.** RP-LC-MS elution profile of four isotopically labeled lipids and their natural analogues

**S2.** Comparison of the theoretical  $^{13}\text{C}$  isotopic enrichment and the observed isotopic pattern of PE 34:1

**S3.** Fragmentation pattern of labeled and unlabeled PA 34:1 and PS 34:1.

**S4.** Trueness of observed fold changes for 20 lipids analyzed by a RP-LC-MS method based on Full-MS quantification

**S5.** Calibration curves of PA 34:1 with and without internal standardization

**S6.** List of  $^{13}\text{C}$  isotopically enriched lipids identified in *Pichia pastoris*
